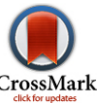

## Correction

# Correction: Pitavastatin and Atorvastatin Double-Blind Randomized Comparative Study among High-Risk Patients, Including Those with Type 2 Diabetes Mellitus, in Taiwan (PAPAGO-T Study)

## The PLOS ONE Staff

There is an error in affiliation 3 for author Liang-Yu Lin. Affiliation 3 should be: Institute of Pharmacology, National Yang-Ming University and Division of Endocrinology and Metabolism, Internal Medicine, Taipei Veterans General Hospital, Taipei, Taiwan.

## Reference

1. Liu P-Y, Lin L-Y, Lin H-J, Hsia C-H, Hung Y-R, et al. (2013) Pitavastatin and Atorvastatin Double-Blind Randomized Comparative Study among High-Risk Patients, Including Those with Type 2 Diabetes Mellitus, in Taiwan (PAPAGO-T Study). PLoS ONE 8(10): e76298. doi:10.1371/journal.pone.0076298

**Citation:** The PLOS ONE Staff (2014) Correction: Pitavastatin and Atorvastatin Double-Blind Randomized Comparative Study among High-Risk Patients, Including Those with Type 2 Diabetes Mellitus, in Taiwan (PAPAGO-T Study). PLoS ONE 9(11): e114175. doi:10.1371/journal.pone.0114175

**Published:** November 18, 2014

**Copyright:** © 2014 The PLOS ONE Staff. This is an open-access article distributed under the terms of the Creative Commons Attribution License, which permits unrestricted use, distribution, and reproduction in any medium, provided the original author and source are credited.
